# Supplementary material
Source: PubMed Central journal article supplement (PMC6862569)
Supplement: sb9b00220_si_001.pdf [file sb9b00220_si_001.pdf]

# Design and control of extrachromosomal elements in *Methylobacterium extorquens* AM1

Martina Carrillo<sup>1</sup>, Marcel Wagner<sup>2</sup>, Florian Petit<sup>1</sup>, Amelie Dransfeld<sup>1,2</sup>, Anke Becker<sup>2</sup>, Tobias J. Erb<sup>1,2\*</sup>

<sup>1</sup>Max Planck Institute for Terrestrial Microbiology, Department of Biochemistry & Synthetic Metabolism, Karl-von-Frisch-Str. 10, 35043 Marburg, Germany; <sup>2</sup>LOEWE Center for Synthetic Microbiology, 35043 Marburg, Germany

\*Correspondence: toerb@mpi-marburg.mpg.de

## SUPPORTING INFORMATION

### Contents of the material supplied as Supporting Information:

Table S1 Strains used in this study.

Table S2 Plasmids used in this study.

Table S3 Primers used in this study.

Table S4 Fold induction of IPTG-inducible promoters in *M. extorquens* AM1.

Fig. S1  $P_{L/O4/A1}$  promoter in *M. extorquens* AM1.

Fig. S2 Overview of the individual *repABC* regions tested in this study.

Fig. S3 Verification of flow cytometry sensitivity.

Fig. S4 Replicon stability measured by flow cytometry of mini-chromosomes.

Table S5 DNA sequences of inducible promoters characterized in this study.

**Table S1** Strains used in this study.

| Strains                            | Description                                                                                                                                                                                       | Reference                                   |
|------------------------------------|---------------------------------------------------------------------------------------------------------------------------------------------------------------------------------------------------|---------------------------------------------|
| CM2720                             | <i>Methyloburum extorquens</i> AM1 strain deficient in cellulose production                                                                                                                       | Delaney <i>et al.</i> , 2013 <sup>1</sup>   |
| SmCreΔhsdR                         | <i>Sinorhizobium meliloti</i> Rm1021 <i>cre</i> expression strain with <i>hsdR</i> deletion, <i>tauX::cre-tetRA</i> (Tc <sup>R</sup> )                                                            | Döhlemann <i>et al.</i> , 2016 <sup>2</sup> |
| <i>Escherichia coli</i> DH5α       | F- Φ80 <i>lacZ</i> ΔM15 Δ( <i>lacZYA-argF</i> ) U169 <i>recA1 endA1 hsdR17</i> (r <sub>k</sub> <sup>-</sup> , m <sub>k</sub> <sup>+</sup> ) <i>phoA supE44 thi-1 gyrA96 relA1 λ</i> <sup>-</sup>  | Thermo Fischer Scientific                   |
| <i>E. coli</i> TOP10               | F- <i>mcrA</i> Δ( <i>mrr-hsdRMS-mcrBC</i> ) Φ80 <i>lacZ</i> ΔM15 Δ <i>lacX74 recA1 araD139</i> Δ( <i>ara leu</i> ) 7697 <i>galU galK rpsL (StrR) endA1 nupG</i>                                   | Thermo Fischer Scientific                   |
| <i>E. coli</i> TOP10 Δ <i>dapA</i> | F- <i>mcrA</i> Δ( <i>mrr-hsdRMS-mcrBC</i> ) Φ80 <i>lacZ</i> ΔM15 Δ <i>lacX74 recA1 araD139</i> Δ( <i>ara leu</i> ) 7697 <i>galU galK rpsL (StrR) endA1 nupG dapA::FRT-cat-FRT</i> ; DAP deficient | This study                                  |

DAP – diaminopimelic acid

**Table S2** Plasmids used in this study.

| Plasmids    | Description                                                                             | Cloning strategy                                                                                                                                                                           | Reference                                      |
|-------------|-----------------------------------------------------------------------------------------|--------------------------------------------------------------------------------------------------------------------------------------------------------------------------------------------|------------------------------------------------|
| pRK2013     | Mobilization helper plasmid, Km <sup>R</sup>                                            | n. a.                                                                                                                                                                                      | Figurski and Helinski, 1979 <sup>3</sup>       |
| pK18mob2    | Suicide vector, Km <sup>R</sup>                                                         | n. a.                                                                                                                                                                                      | Tauch <i>et al.</i> , 1998 <sup>4</sup>        |
| pKD3        | FRT-flanked chloramphenicol resistance cassette, Amp <sup>R</sup> Cm <sup>R</sup>       | n. a.                                                                                                                                                                                      | Datsenko <i>et al.</i> , 2000 <sup>5</sup>     |
| pACYC184    | Carrying p15A replication origin, Cm <sup>R</sup> , Tc <sup>R</sup>                     | n. a.                                                                                                                                                                                      | Chang and Cohen, 1978 <sup>6</sup>             |
| pXG-10      | Carrying pSC101* replication origin, Cm <sup>R</sup>                                    | n. a.                                                                                                                                                                                      | Urban and Vogel, 2007 <sup>7</sup>             |
| pIND4       | pMG160 origin, P <sub>A1/04/03</sub> promoter, empty vector, Km <sup>R</sup>            | n. a.                                                                                                                                                                                      | Ind <i>et al.</i> , 2009 <sup>8</sup>          |
| pTE1830     | pMG160 origin, P <sub>A1/04/03</sub> promoter, empty vector, Gm <sup>R</sup>            | PCR products of prMC276+MC278 from pIND4, prMC228+MC277 from pIND4, and prMC274+MC275 from pLAR-Gm ( <i>aacC1</i> ) were assembled via Gibson assembly.                                    | This study                                     |
| pTE1841     | pMG160 origin, P <sub>A1/04/03</sub> promoter, empty vector, Tc <sup>R</sup>            | NheI, NotI 5.283 bp fragment from pIND4, PCR products of pr276+295 from pIND4, prMC311+MC277 from pIND4, and prMC296+MC297 from pTE100 ( <i>tetA</i> ) were assembled via Gibson assembly. | This study                                     |
| pTE100      | Promoter-less, oriV-traJ' origin, Tc <sup>R</sup>                                       | n. a.                                                                                                                                                                                      | Schada v. B. <i>et al.</i> , 2015 <sup>9</sup> |
| pTE101      | Promoter-less, oriV-traJ' origin, Km <sup>R</sup>                                       | n. a.                                                                                                                                                                                      | Schada v. B. <i>et al.</i> , 2015 <sup>9</sup> |
| pTE102      | P <sub>mxaF</sub> promoter, oriV-traJ' origin, Tc <sup>R</sup>                          | n. a.                                                                                                                                                                                      | Schada v. B. <i>et al.</i> , 2015 <sup>9</sup> |
| pTE102-mChe | P <sub>mxaF</sub> promoter, mCherry, oriV-traJ' origin, Tc <sup>R</sup>                 | n. a.                                                                                                                                                                                      | Schada v. B. <i>et al.</i> , 2015 <sup>9</sup> |
| pTE104-mChe | P <sub>coxB</sub> promoter, mCherry, oriV-traJ' origin, Tc <sup>R</sup>                 | n. a.                                                                                                                                                                                      | Schada v. B. <i>et al.</i> , 2015 <sup>9</sup> |
| pLoriVSm    | Unloaded library vector for <i>repABC</i> regions, pK18mob2-derivative, Km <sup>R</sup> | n. a.                                                                                                                                                                                      | Döhlemann <i>et al.</i> , 2017 <sup>10</sup>   |
| pLsynTer-1  | Library plasmid providing <i>synTer1</i> -MCS, Km <sup>R</sup>                          | n. a.                                                                                                                                                                                      | Döhlemann <i>et al.</i> , 2017 <sup>10</sup>   |
| pLsynTer-2  | Library plasmid providing <i>synTer2</i> -MCS, Km <sup>R</sup>                          | n. a.                                                                                                                                                                                      | Döhlemann <i>et al.</i> , 2017 <sup>10</sup>   |
| pLsynTer-3  | Library plasmid providing <i>synTer3</i> -MCS, Km <sup>R</sup>                          | n. a.                                                                                                                                                                                      | Döhlemann <i>et al.</i> , 2017 <sup>10</sup>   |
| pLAR-Km     | Library plasmid providing a kanamycin resistance cassette, Km <sup>R</sup>              | n. a.                                                                                                                                                                                      | Döhlemann <i>et al.</i> , 2017 <sup>10</sup>   |

|          |                                                                                                  |                                                                                                                                                                                                                                                                                                                                                                                                |                                                 |
|----------|--------------------------------------------------------------------------------------------------|------------------------------------------------------------------------------------------------------------------------------------------------------------------------------------------------------------------------------------------------------------------------------------------------------------------------------------------------------------------------------------------------|-------------------------------------------------|
| pLAR-Gm  | Library plasmid providing a gentamicin resistance cassette<br>Km <sup>R</sup> , Gm <sup>R</sup>  | n. a.                                                                                                                                                                                                                                                                                                                                                                                          | Döhlemann <i>et al.</i> ,<br>2017 <sup>10</sup> |
| pLAR-Tc  | Library plasmid providing a tetracyclin resistance cassette<br>Km <sup>R</sup> , Tc <sup>R</sup> | n. a.                                                                                                                                                                                                                                                                                                                                                                                          | Döhlemann <i>et al.</i> ,<br>2017 <sup>10</sup> |
| pLoriT   | Unloaded library vector for oriT parts, pK18mob2-<br>derivative, Km <sup>R</sup>                 | n. a.                                                                                                                                                                                                                                                                                                                                                                                          | Döhlemann <i>et al.</i> ,<br>2017 <sup>10</sup> |
| pLoriT-1 | Library plasmid providing a <i>mob</i> site                                                      | n. a.                                                                                                                                                                                                                                                                                                                                                                                          | Döhlemann <i>et al.</i> ,<br>2017 <sup>10</sup> |
| pAD1     | pLoriVSm with <i>repABC_Mex-DM4</i> , Km <sup>R</sup>                                            | Backbone: <i>ScaI</i> linearized and dephosphorylated pLoriVSm; Insert: T4 PNK phosphorylated PCR product of prAD7+8 from <i>Methylobacterium extorquens</i> DM4 gDNA.                                                                                                                                                                                                                         | This study                                      |
| pAD2     | pLoriVSm with <i>repABC_Ocar-2a</i> , Km <sup>R</sup>                                            | Backbone: <i>ScaI</i> linearized and dephosphorylated pLoriVSm; Insert: T4 PNK phosphorylated PCR product of prAD13+14 from <i>Oligotropha carboxidovorans</i> OM5 gDNA.                                                                                                                                                                                                                       | This study                                      |
| pAD3     | pLoriVSm with <i>repABC_Mrad-JCM</i> , Km <sup>R</sup>                                           | Backbone: <i>ScaI</i> linearized and dephosphorylated pLoriVSm; Insert: T4 PNK phosphorylated PCR product of prAD9+10 from <i>Methylobacterium radiotolerans</i> JCM2831 gDNA.                                                                                                                                                                                                                 | This study                                      |
| pAD4     | pLoriVSm with <i>repABC_Ocar-1</i> , Km <sup>R</sup>                                             | Backbone: <i>ScaI</i> linearized and dephosphorylated pLoriVSm; Insert: T4 PNK phosphorylated PCR product of prAD11+12 from <i>Oligotropha carboxidovorans</i> OM5 gDNA.                                                                                                                                                                                                                       | This study                                      |
| pAD5     | pLoriVSm with <i>repABC_Nham-2a</i> , Km <sup>R</sup>                                            | Backbone: <i>ScaI</i> linearized and dephosphorylated pLoriVSm; Insert: T4 PNK phosphorylated PCR product of prAD3+4 from <i>Nitrobacter hamburgensis</i> X14 gDNA.                                                                                                                                                                                                                            | This study                                      |
| pAD6     | pLoriVSm with <i>repABC_Nham-3</i> , Km <sup>R</sup>                                             | Backbone: <i>ScaI</i> linearized and dephosphorylated pLoriVSm; Insert: T4 PNK phosphorylated PCR product of prAD5+6 from <i>Nitrobacter hamburgensis</i> X14 gDNA.                                                                                                                                                                                                                            | This study                                      |
| pAD7     | pLoriVSm with <i>repABC_Ocar-2b</i> , Km <sup>R</sup>                                            | Backbone: <i>ScaI</i> linearized and dephosphorylated pLoriVSm; Insert: T4 PNK phosphorylated PCR product of prAD13+15 from <i>Oligotropha carboxidovorans</i> OM5 gDNA.                                                                                                                                                                                                                       | This study                                      |
| pAD8     | pLoriVSm with <i>repABC_Mex-CM4</i> , Km <sup>R</sup>                                            | Backbone: <i>ScaI</i> linearized and dephosphorylated pLoriVSm; Insert: T4 PNK phosphorylated PCR product of prAD24+25 from <i>Methylobacterium extorquens</i> CM4 gDNA.                                                                                                                                                                                                                       | This study                                      |
| pAD9     | pLoriVSm with <i>repABC_Mnod-1</i> , Km <sup>R</sup>                                             | Backbone: <i>ScaI</i> linearized and dephosphorylated pLoriVSm; Insert: T4 PNK phosphorylated PCR product of prAD26+27 from <i>Methylobacterium nodulans</i> ORS 2060 gDNA.                                                                                                                                                                                                                    | This study                                      |
| pAD10    | pLoriVSm with <i>repABC_Mnod-2</i> , Km <sup>R</sup>                                             | Backbone: <i>ScaI</i> linearized and dephosphorylated pLoriVSm; Insert: T4 PNK phosphorylated PCR product of prAD28+29 from <i>Methylobacterium nodulans</i> ORS 2060 gDNA.                                                                                                                                                                                                                    | This study                                      |
| pAD11    | pLoriVSm with <i>repABC_Nham-2b</i> , Km <sup>R</sup>                                            | Backbone: <i>ScaI</i> linearized and dephosphorylated pLoriVSm; Insert: T4 PNK phosphorylated PCR product of prAD1+2 from <i>Nitrobacter hamburgensis</i> X14 gDNA.                                                                                                                                                                                                                            | This study                                      |
| pMW216   | Km <sup>R</sup> pMB1 origin; <i>repABC_Mex-DM4</i> ; MCS 1                                       | Phosphorylated PCR products of primers AR_for + AR_rev from pLAR-Km ( <i>P<sub>min2-nptII</sub></i> ), pMB1_for + pMB1_rev from pK18mob2 (pMB1 origin), oriVSm_for + oriVSm_rev from pAD1 ( <i>repABC_MexDM4</i> ), synTer-MCS_for + synTer-MCS_rev from pLsynTer-1 (MCS1) were <i>in vitro</i> assembled via ligase cycling reaction using bridging oligonucleotides BO1, BO2, BO3 and BO4.   | This study                                      |
| pMW217   | Km <sup>R</sup> pMB1 origin; <i>repABC_Mrad-JCM</i> ; MCS 1                                      | Phosphorylated PCR products of primers AR_for + AR_rev from pLAR-Km ( <i>P<sub>min2-nptII</sub></i> ), pMB1_for + pMB1_rev from pK18mob2 (pMB1 origin), oriVSm_for + oriVSm_rev from pAD3 ( <i>repABC_Mrad-JCM</i> ), synTer-MCS_for + synTer-MCS_rev from pLsynTer-1 (MCS1) were <i>in vitro</i> assembled via ligase cycling reaction using bridging oligonucleotides BO1, BO2, BO3 and BO4. | This study                                      |

|        |                                                                                               |                                                                                                                                                                                                                                                                                                                                                                                         |            |
|--------|-----------------------------------------------------------------------------------------------|-----------------------------------------------------------------------------------------------------------------------------------------------------------------------------------------------------------------------------------------------------------------------------------------------------------------------------------------------------------------------------------------|------------|
| pMW218 | Km <sup>R</sup> pMB1 origin; <i>repABC_Nham-3</i> ; MCS 1                                     | Phosphorylated PCR products of primers AR_for + AR_rev from pLAR-Km ( $P_{\min 2-nptII}$ ), pMB1_for + pMB1_rev from pK18mob2 (pMB1 origin), oriVSm_for + oriVSm_rev from pAD6 ( <i>repABC_Nham-3</i> ), synTer-MCS_for + synTer-MCS_rev from pLsynTer-1 (MCS1) were <i>in vitro</i> assembled via ligase cycling reaction using bridging oligonucleotides BO1, BO2, BO3 and BO4.       | This study |
| pMW219 | Km <sup>R</sup> pMB1 origin; <i>repABC_Mex-CM4</i> ; MCS 1                                    | Phosphorylated PCR products of primers AR_for + AR_rev from pLAR-Km ( $P_{\min 2-nptII}$ ), pMB1_for + pMB1_rev from pK18mob2 (pMB1 origin), oriVSm_for + oriVSm_rev from pAD8 ( <i>repABC_Mex-CM4</i> ), synTer-MCS_for + synTer-MCS_rev from pLsynTer-1 (MCS1) were <i>in vitro</i> assembled via ligase cycling reaction using bridging oligonucleotides BO1, BO2, BO3 and BO4.      | This study |
| pMW220 | Gm <sup>R</sup> p15A origin; <i>repABC_Mex-DM4</i> ; MCS 2                                    | Phosphorylated PCR products of primers AR_for + AR_rev from pLAR-Gm ( $P_{\min 2-aacC1}$ ), p15A_for + p15A_rev from pACYC184 (p15A origin), oriVSm_for + oriVSm_rev from pAD1 ( <i>repABC_Mex-DM4</i> ), synTer-MCS_for + synTer-MCS_rev from pLsynTer-2 (MCS2) were <i>in vitro</i> assembled via ligase cycling reaction using bridging oligonucleotides BO1, BO2, BO3 and BO4.      | This study |
| pMW221 | Gm <sup>R</sup> p15A origin; <i>repABC_Nham-3</i> ; MCS 1                                     | Phosphorylated PCR products of primers AR_for + AR_rev from pLAR-Gm ( $P_{\min 2-aacC1}$ ), p15A_for + p15A_rev from pACYC184 (p15A origin), oriVSm_for + oriVSm_rev from pAD6 ( <i>repABC_Nham-3</i> ), synTer-MCS_for + synTer-MCS_rev from pLsynTer-1 (MCS1) were <i>in vitro</i> assembled via ligase cycling reaction using bridging oligonucleotides BO1, BO2, BO3 and BO4.       | This study |
| pMW223 | Tc <sup>R</sup> p15A origin; <i>repABC_Mex-DM4</i> ; MCS 2                                    | Phosphorylated PCR products of primers AR_for + AR_rev from pLAR-Tc ( $P_{\min 2-tetR}$ ), p15A_for + p15A_rev from pACYC184 (p15A origin), oriVSm_for + oriVSm_rev from pAD1 ( <i>repABC_Mex-DM4</i> ), synTer-MCS_for + synTer-MCS_rev from pLsynTer-2 (MCS2) were <i>in vitro</i> assembled via ligase cycling reaction using bridging oligonucleotides BO1, BO2, BO3 and BO4.       | This study |
| pMW224 | Tc <sup>R</sup> pSC101* origin; <i>repABC_Nham-3</i> ; MCS 3                                  | Phosphorylated PCR products of primers AR_for + AR_rev from pLAR-Tc ( $P_{\min 2-tetR}$ ), pSC101*_for + pSC101*_rev from pXG-10 (pSC101* origin), oriVSm_for + oriVSm_rev from pAD6 ( <i>repABC_Nham-3</i> ), synTer-MCS_for + synTer-MCS_rev from pLsynTer-3 (MCS3) were <i>in vitro</i> assembled via ligase cycling reaction using bridging oligonucleotides BO1, BO2, BO3 and BO4. | This study |
| pMW231 | Library plasmid providing the gene for the Cre recombinase under the control of $P_{LJ04/A1}$ | Backbone: <i>ScaI</i> linearized and dephosphorylated pLoriT; Insert: T4 PNK phosphorylated PCR products of prMW1041+1042 from pTE1887 and prMW1028+1029 from SmCre $\Delta$ hsdR gDNA. Three- component ligation with T4 DNA ligase.                                                                                                                                                   | This study |
| pMW232 | Library plasmid providing the gene for the Cre recombinase under the control of $P_{CoxB}$    | Backbone: <i>ScaI</i> linearized and dephosphorylated pLoriT; Insert: T4 PNK phosphorylated PCR products of prMW1043+1044 from pTE104-mChe and prMW1028+1029 from SmCre $\Delta$ hsdR gDNA. Three- component ligation with T4 DNA ligase.                                                                                                                                               | This study |
| pMW233 | Gm <sup>R</sup> ; pMB1 origin; <i>repABC_Mex-CM4</i> ; MCS 1; oriT                            | Phosphorylated PCR products of primers AR_for + AR_rev from pLAR-Gm ( $P_{\min 2-aacC1}$ ), pMB1_for + pMB1_rev from pK18mob2 (pMB1 origin), oriVSm_for + oriVSm_rev from pAD8 ( <i>repABC_Mex-CM4</i> ), synTer-MCS_for + synTer-MCS_rev from pLsynTer-1 (MCS1), mob_for                                                                                                               | This study |

|         |                                                                                                 |                                                                                                                                                                                                                                                                                                                                                                                                                                                                            |            |
|---------|-------------------------------------------------------------------------------------------------|----------------------------------------------------------------------------------------------------------------------------------------------------------------------------------------------------------------------------------------------------------------------------------------------------------------------------------------------------------------------------------------------------------------------------------------------------------------------------|------------|
|         |                                                                                                 | + mob_rev from pLoriT-1 ( <i>mob</i> site) were <i>in vitro</i> assembled via ligase cycling reaction using bridging oligonucleotides BO1, BO2, BO3a, BO3b and BO4.                                                                                                                                                                                                                                                                                                        |            |
| pMW234  | Gm <sup>R</sup> ; pMB1 origin; <i>repABC</i> _Nham-3; MCS 2; oriT                               | Phosphorylated PCR products of primers AR_for + AR_rev from pLAR-Gm (P <sub>min2</sub> - <i>aacC1</i> ), pMB1_for + pMB1_rev from pK18mob2 (pMB1 origin), oriVSm_for + oriVSm_rev from pAD6 ( <i>repABC</i> _Nham-3), synTer-MCS_for + synTer-MCS_rev from pLsynTer-2 (MCS2), mob_for + mob_rev from pLoriT-1 ( <i>mob</i> site) were <i>in vitro</i> assembled via ligase cycling reaction using bridging oligonucleotides BO1, BO2, BO3a, BO3b and BO4.                  | This study |
| pMW235  | Tc <sup>R</sup> ; pMB1 origin; <i>repABC</i> _Mex-DM4; MCS 3; oriT                              | Phosphorylated PCR products of primers AR_for + AR_rev from pLAR-Tc (P <sub>min2</sub> - <i>tetR</i> ), pMB1_for + pMB1_rev from pK18mob2 (pMB1 origin), oriVSm_for + oriVSm_rev from pAD1 ( <i>repABC</i> _Mex-DM4), synTer-MCS_for + synTer-MCS_rev from pLsynTer-3 (MCS3), mob_for + mob_rev from pLoriT-1 ( <i>mob</i> site) were <i>in vitro</i> assembled via ligase cycling reaction using bridging oligonucleotides BO1, BO2, BO3a, BO3b and BO4.                  | This study |
| pMW236  | Gm <sup>R</sup> ; pMB1 origin; <i>repABC</i> _Mrad-JCM; MCS 1; oriT                             | Phosphorylated PCR products of primers AR_for + AR_rev from pLAR-Gm (P <sub>min2</sub> - <i>aacC1</i> ), pMB1_for + pMB1_rev from pK18mob2 (pMB1 origin), oriVSm_for + oriVSm_rev from pAD3 ( <i>repABC</i> _Mrad-JCM), synTer-MCS_for + synTer-MCS_rev from pLsynTer-1 (MCS1), mob_for + mob_rev from pLoriT-1 ( <i>mob</i> site) were <i>in vitro</i> assembled via ligase cycling reaction using bridging oligonucleotides BO1, BO2, BO3a, BO3b and BO4.                | This study |
| pMW237  | Km <sup>R</sup> ; pMB1 origin; <i>repABC</i> _Mex-CM4; MCS 1; P <sub>coxB</sub> - <i>cre</i>    | Phosphorylated PCR products of primers AR_for + AR_rev from pLAR-Km (P <sub>min2</sub> - <i>nptII</i> ), pMB1_for + pMB1_rev from pK18mob2 (pMB1 origin), oriVSm_for + oriVSm_rev from pAD8 ( <i>repABC</i> _Mex-CM4), synTer-MCS_for + synTer-MCS_rev from pLsynTer-1 (MCS1), mob_for + mob_rev from pMW232 (P <sub>coxB</sub> - <i>cre</i> ) were <i>in vitro</i> assembled via ligase cycling reaction using bridging oligonucleotides BO1, BO2, BO3a, BO3b and BO4.    | This study |
| pMW238  | Km <sup>R</sup> ; pMB1 origin; <i>repABC</i> _Mex-CM4; MCS 1; P <sub>L/O4/A1</sub> - <i>cre</i> | Phosphorylated PCR products of primers AR_for + AR_rev from pLAR-Km (P <sub>min2</sub> - <i>nptII</i> ), pMB1_for + pMB1_rev from pK18mob2 (pMB1 origin), oriVSm_for + oriVSm_rev from pAD8 ( <i>repABC</i> _Mex-CM4), synTer-MCS_for + synTer-MCS_rev from pLsynTer-1 (MCS1), mob_for + mob_rev from pMW231 (P <sub>L/O4/A1</sub> - <i>cre</i> ) were <i>in vitro</i> assembled via ligase cycling reaction using bridging oligonucleotides BO1, BO2, BO3a, BO3b and BO4. | This study |
| pTE1179 | pK18mob2 with homologous region of <i>kata</i> (META1p3421), Km <sup>R</sup>                    | Backbone: XbaI, KpnI linearized pK18mob2; Insert: XbaI, KpnI digest of PCR product from <i>M. extorquens</i> AM1 gDNA prMC157+158. Ligation with T4 DNA ligase.                                                                                                                                                                                                                                                                                                            | This study |
| pTE1870 | P <sub>A1/O4/O3</sub> -mCherry_AAV protein degradation tag, Km <sup>R</sup>                     | Backbone: BsrGI, HindIII digested pTE1853; Insert: primer hybridization product prMC398+399. Ligation with T4 DNA ligase.                                                                                                                                                                                                                                                                                                                                                  | This study |
| pTE1875 | P <sub>mxaF</sub> -mCherry_AAV protein degradation tag, Tc <sup>R</sup>                         | Backbone: SpeI, KpnI lin pTE102; Insert: XbaI, KpnI 786bp fragment from pTE1870. Ligation with T4 DNA ligase.                                                                                                                                                                                                                                                                                                                                                              | This study |
| pTE1899 | pTE1179 with P <sub>mxaF</sub> -mCherry_AAV tag expression cassette, Km <sup>R</sup>            | Backbone: XbaI linearized pTE1179; Insert: XbaI, SpeI 1.3 kb fragment of pTE1875. Ligation with T4 DNA ligase. Product 1.                                                                                                                                                                                                                                                                                                                                                  | This study |
| pTE1825 | pIND4-derivative with P <sub>A1/O4/O3</sub> -mCherry                                            | Backbone: HindIII, XbaI linearized pIND4; Insert: HindIII, XbaI 740 bp fragment of pTE102-mChe. Ligation with T4 DNA ligase.                                                                                                                                                                                                                                                                                                                                               | This study |
| pTE1852 | KpnI site at bp 1292 removed by SNP mutation, Km <sup>R</sup>                                   | QuikChange mutagenesis of pTE1825 with prMC348+349.                                                                                                                                                                                                                                                                                                                                                                                                                        | This study |
| pTE1853 | P <sub>A1/O4/O3</sub> -mCherry; KpnI sites removed, Km <sup>R</sup>                             | QuikChange mutagenesis of pTE1852 with prMC353+354.                                                                                                                                                                                                                                                                                                                                                                                                                        | This study |

|         |                                                                                                   |                                                                                                                                              |            |
|---------|---------------------------------------------------------------------------------------------------|----------------------------------------------------------------------------------------------------------------------------------------------|------------|
| pTE1855 | P <sub>L/O4</sub> -mCherry, Km <sup>R</sup>                                                       | Backbone: XbaI, AatII linearized pTE1853; Insert: primer hybridization product prMC361-8. Ligation with T4 DNA ligase.                       | This study |
| pTE1856 | P <sub>L/O4/O3</sub> -mCherry, Km <sup>R</sup>                                                    | Backbone: XbaI, AatII linearized pTE1853; Insert: primer hybridization product prMC361-367+369+370. Ligation with T4 DNA ligase.             | This study |
| pTE1877 | P <sub>L/O4/A1</sub> -mCherry, Km <sup>R</sup>                                                    | Backbone: XbaI, AatII linearized pTE1853; Insert: primer hybridization product prMC361-366+422+421. Ligation with T4 DNA ligase.             | This study |
| pTE1878 | P <sub>A1/O5/O4</sub> -mCherry, Km <sup>R</sup>                                                   | Backbone: XbaI, AatII linearized pTE1853; Insert: primer hybridization product prMC361-363+381+383+378+419+420. Ligation with T4 DNA ligase. | This study |
| pTE1879 | P <sub>A1con/O5/O4</sub> -mCherry, Km <sup>R</sup>                                                | Backbone: XbaI, AatII linearized pTE1853; Insert: primer hybridization product prMC361-363+377+381+383+419+423. Ligation with T4 DNA ligase  | This study |
| pTE1880 | P <sub>A1/O4</sub> -mCherry, Km <sup>R</sup>                                                      | Backbone: XbaI, AatII linearized pTE1853; Insert: primer hybridization product prMC361-363+376+380+382+419+420. Ligation with T4 DNA ligase. | This study |
| pTE1881 | P <sub>A1/O4s</sub> -mCherry, Km <sup>R</sup>                                                     | Backbone: XbaI, AatII linearized pTE1853; Insert: primer hybridization product prMC361-363+379+380+382+419+424. Ligation with T4 DNA ligase. | This study |
| pTE1882 | P <sub>A1/O4s_GA</sub> -mCherry, Km <sup>R</sup>                                                  | Backbone: XbaI, AatII linearized pTE1853; Insert: primer hybridization product prMC361-363+380+419+424+425+426. Ligation with T4 DNA ligase. | This study |
| pTE1863 | P <sub>T5s/A1URS/O3</sub> -mCherry, Km <sup>R</sup>                                               | Backbone: XbaI, AatII linearized pTE1853; Insert: primer hybridization product prMC361-363+369+373-375+380. Ligation with T4 DNA ligase.     | This study |
| pTE2714 | P <sub>A1/O4/O3</sub> promoter; empty multiple cloning site with Strep-II tag, Km <sup>R</sup>    | Backbone: XbaI, HindIII cut pTE1853; Insert: primer hybridization product prMC404-408. Ligation with T4 DNA ligase.                          | This study |
| pTE1885 | P <sub>L/O4</sub> promoter; empty multiple cloning site with Strep-II tag, Km <sup>R</sup>        | Backbone: XbaI, HindIII cut pTE1855; Insert: primer hybridization product prMC404-408. Ligation with T4 DNA ligase.                          | This study |
| pTE1886 | P <sub>L/O4/O3</sub> promoter; empty multiple cloning site with Strep-II tag, Km <sup>R</sup>     | Backbone: XbaI, HindIII cut pTE1856; Insert: primer hybridization product prMC404-408. Ligation with T4 DNA ligase.                          | This study |
| pTE1887 | P <sub>L/O4/A1</sub> promoter; empty multiple cloning site with Strep-II tag, Km <sup>R</sup>     | Backbone: XbaI, HindIII cut pTE1877; Insert: primer hybridization product prMC404-408. Ligation with T4 DNA ligase.                          | This study |
| pTE1888 | P <sub>A1/O5/O4</sub> promoter; empty multiple cloning site with Strep-II tag, Km <sup>R</sup>    | Backbone: XbaI, HindIII cut pTE1878; Insert: primer hybridization product prMC404-408. Ligation with T4 DNA ligase.                          | This study |
| pTE1889 | P <sub>A1con/O5/O4</sub> promoter; empty multiple cloning site with Strep-II tag, Km <sup>R</sup> | Backbone: XbaI, HindIII cut pTE1879; Insert: primer hybridization product prMC404-408. Ligation with T4 DNA ligase.                          | This study |
| pTE1890 | P <sub>A1/O4</sub> promoter; empty multiple cloning site with Strep-II tag, Km <sup>R</sup>       | Backbone: XbaI, HindIII cut pTE1880; Insert: primer hybridization product prMC404-408. Ligation with T4 DNA ligase.                          | This study |
| pTE1891 | P <sub>A1/O4s</sub> promoter; empty multiple cloning site with Strep-II tag, Km <sup>R</sup>      | Backbone: XbaI, HindIII cut pTE1881; Insert: primer hybridization product prMC404-408. Ligation with T4 DNA ligase.                          | This study |
| pTE1892 | P <sub>A1/O4s_GA</sub> promoter; empty multiple cloning site with Strep-II tag, Km <sup>R</sup>   | Backbone: XbaI, HindIII cut pTE1882; Insert: primer hybridization product prMC404-408. Ligation with T4 DNA ligase.                          | This study |
| pTE1893 | P <sub>T5s/A1</sub> promoter; empty multiple cloning site with Strep-II tag, Km <sup>R</sup>      | Backbone: XbaI, HindIII cut pTE1863; Insert: primer hybridization product prMC404-408. Ligation with T4 DNA ligase.                          | This study |
| pTE2704 | P <sub>mxaF</sub> -mCherry_AAV; repABC_Mex-DM4, Km <sup>R</sup>                                   | Backbone: ScaI, PaeI linearized pMW216; Insert: ScaI, PaeI digest of PCR product prMC437+438 of pTE1875. Ligation with T4 DNA ligase.        | This study |

|         |                                                                          |                                                                                                                                                                       |            |
|---------|--------------------------------------------------------------------------|-----------------------------------------------------------------------------------------------------------------------------------------------------------------------|------------|
| pTE2705 | P <sub>mxaF</sub> -mCherry_AAV; <i>repABC</i> _Mrad-JCM, Km <sup>R</sup> | Backbone: <i>Sca</i> I, <i>Pac</i> I linearized pMW217; Insert: <i>Sca</i> I, <i>Pac</i> I digest of PCR product prMC437+438 of pTE1875. Ligation with T4 DNA ligase. | This study |
| pTE2706 | P <sub>mxaF</sub> -mCherry_AAV; <i>repABC</i> _Nham-3, Km <sup>R</sup>   | Backbone: <i>Sca</i> I, <i>Pac</i> I linearized pMW218; Insert: <i>Sca</i> I, <i>Pac</i> I digest of PCR product prMC437+438 of pTE1875. Ligation with T4 DNA ligase. | This study |
| pTE2707 | P <sub>mxaF</sub> -mCherry_AAV; <i>repABC</i> _Mex-CM4, Km <sup>R</sup>  | Backbone: <i>Sca</i> I, <i>Pac</i> I linearized pMW219; Insert: <i>Sca</i> I, <i>Pac</i> I digest of PCR product prMC437+438 of pTE1875. Ligation with T4 DNA ligase. | This study |

n. a. – not applicable, gDNA – genomic DNA, Amp<sup>R</sup> – ampicillin resistance, Cm<sup>R</sup> – chloramphenicol resistance, Gm<sup>R</sup> – gentamicin resistance, Km<sup>R</sup> – kanamycin resistance, Tc<sup>R</sup> – tetracycline resistance, pr – primers



**Table S3** Primers used in this study.

| Primer # | Sequence                                                                        |
|----------|---------------------------------------------------------------------------------|
| MC147    | ATTCAACTCCCGCACGAGT                                                             |
| MC148    | GGCACCTTGTGATCATCGC                                                             |
| MC157    | TGATCTAGAGATTCTGACGACCCGTCAGG                                                   |
| MC158    | TATGGTACCTCGCGCTGGTTCGAATAGAC                                                   |
| MC228    | GAAACGCCTGGTATCTTTATAGTC                                                        |
| MC261    | TGCCATACCAAACGTACCATTGAGACACTTGTTCACAGAGGATGGCCCTGGGAATTAGCCATGGTC              |
| MC262    | AGACCCAGTTCCTTACATGCCCATTTACCCTGGGATTGGATTGGGTTGCGACTCAGTCTTGAGCGATTGTG<br>TAGG |
| MC274    | ACAGTAATACAAGGGGTGTTATGTTACGCAGCAGCAACG                                         |
| MC275    | CAACCAATTAACCAATTCTGTTAGGTGGCGGTAAGTGGG                                         |
| MC276    | AACACCCCTTGTATTACTG                                                             |
| MC277    | CAGAATTGGTTAATTGGTTG                                                            |
| MC278    | ATAAAGATACCAGGCGTTTC                                                            |
| MC295    | TCGACGCGGGCCGAGCTTTG                                                            |
| MC296    | CAACCAATTAACCAATTCTGATCAGCGATCGGCTCGTTGC                                        |
| MC297    | ACAGTAATACAAGGGGTGTTTCATGCTTGACACTTTATCAC                                       |
| MC311    | TTATTGGTGAGAATCCAAGC                                                            |
| MC348    | CGCGCGAATTGCAGTTACCATTATCAGGG                                                   |
| MC349    | CCCTGATAAATGGTAACTGCAATTCGCGCG                                                  |
| MC352    | CGAGCTCGGTACTGACGTAGCCGACG                                                      |
| MC353    | GCTGGGCTACGTACGTACCGAGCTCG                                                      |
| MC361    | CTAAGAAACCATTATTATCATGAC                                                        |
| MC362    | ATTAACCTATAAAAATAGGCGTATCACGAGGCCCTTTCGTC                                       |
| MC363    | CCTATTTTTATAGGTTAATGTCATGATAATAATGGTTTCTTAGACGT                                 |
| MC364    | TTCACCTCGAGAAAAGATAAATTATCTCTGGCGGTGTTGACATGTG                                  |
| MC365    | ATCTTTTCTCGAGGTGAAGACGAAAGGGCCTCGTGATACG                                        |
| MC366    | AGTATCATTGTTATCCGCTCACATGTCAACACCGCCAGAGATAATTT                                 |
| MC367    | CTAGAGTCAGTGCCTCTGCTGATGTGCTC                                                   |
| MC368    | AGCGGATAACAATGATACTGAGCACATCAGCAGGACGCACTGACT                                   |
| MC369    | CTAGACTGTGTGAAATTGTTATCCGCTCACAATTGAATCTA                                       |
| MC370    | AGCGGATAACAATGATACTTAGATTCAATTGTGAGCGGATAACAATTTACACAGT                         |
| MC373    | AGCGCTCACAATTTATAATTAGATTCAATTGTGAGCGGATAACAATTTACACAGT                         |
| MC375    | ATTATAAATTGTGAGCGCTCACAAGCAACACTCTTTTTG                                         |
| MC376    | AGTATCATTGTTATCCGCTCACAAGTCAACACTCTTTTTG                                        |
| MC377    | ATTATAAATTGTTATCCGCTCACAAGTCAACTAAATTGTTACCGCTCA                                |
| MC378    | AGTATCATTGTTATCCGCTCACAAGTCAACTAAATTGTTACCGCTCA                                 |
| MC379    | AGTATCAATTGTGAGCGCTCACAAGTCAACACTCTTTTTG                                        |
| MC380    | ATAAATTTTCTCGAGGTGAAGACGAAAGGGCCTCGTGATACG                                      |
| MC381    | CAATTTTTTCTCGAGGTGAAGACGAAAGGGCCTCGTGATACG                                      |
| MC382    | TTCACCTCGAGAAAATTTATCAAAAAGAGTGTGACTTGTGAGCG                                    |
| MC383    | TTCACCTCGAGAAAAAATTGTGAGCGGTAACAATTTAGTTGACTTGTGAGCG                            |
| MC398    | GTACAAGGCCGGAACGACGAAAACACTACGCCGCGCCGTCTGAACTAGTCTGCAGGTACCTTAAGA              |
| MC399    | AGCTTCTTAAGGTACCTGCAGGACTAGTTCAGACGGCCGCGGCTAGTTTTCTGCTGTTCCGCGCCTT             |
| MC404    | CTAGAATTAAGAGGAGAAATTAACCATGGCGAGCTGGAGCCATCCGAGTTCGAA                          |
| MC405    | AGCTCGCCATGGTTAATTTCTCTTTAATT                                                   |
| MC406    | AAGATCGAAGGCCGCTATGTCGGGCGGATCTGAACTAGTCTGCAGGTACCGTA                           |
| MC407    | TCCGCCCCACATATGGCGCCCTTCGATCTTTTCGAACTGCGGATGGCTCC                              |
| MC408    | AGCTTACGGTACCTGCAGGACTAGTTCAGGA                                                 |
| MC419    | CTAGAGTCGCCGTGCCCTCTCGATGAATCTA                                                 |
| MC420    | GATAACAATGATACTTAGATTCATCGAGAGGGACACGGCGACT                                     |
| MC421    | CTAGAGTCGCCGTGCCCTCTCGATGTGCTC                                                  |
| MC422    | AGCGGATAACAATGATACTGAGCACATCGAGAGGGACACGGCGACT                                  |
| MC423    | GATAACAATTATAATTAGATTCATCGAGAGGGACACGGCGACT                                     |
| MC424    | GATAACAATTATAATTAGATTCATCGAGAGGGACACGGCGACT                                     |
| MC425    | AGTATCAATTGTGAGTGCTCACAAGTCAACACTCTTTTTG                                        |
| MC426    | TTCACCTCGAGAAAATTTATCAAAAAGAGTGTGACTTGTGAGCA                                    |
| MC437    | CTGACAGTACTCAAGCTAGCTTCCCCTGGTTC                                                |
| MC438    | CGCTTAATTAACGACGGCCAGTGAATTAGG                                                  |
| AD1      | ACCCGATCGGAAAACCTTC                                                             |
| AD2      | CTCGAGGGTTGGGCGAAAG                                                             |
| AD3      | ATGGATCCGAAATCGCCAG                                                             |
| AD4      | AACTTCTTCGTAGCGGTC                                                              |

|                       |                                                                    |
|-----------------------|--------------------------------------------------------------------|
| <b>AD5</b>            | AACGAAGTTCGGCCATGACC                                               |
| <b>AD6</b>            | GGCGAACGCGAGGAGAAATT                                               |
| <b>AD7</b>            | ATGCTGCGGATCGCTAAAAAGA                                             |
| <b>AD8</b>            | TTCGGCTTGGTCTCGATCA                                                |
| <b>AD9</b>            | AGGTCTCGGAAAGACATCCG                                               |
| <b>AD10</b>           | CGGATCCAGGTGTTCCAGGAA                                              |
| <b>AD11</b>           | ATCATTGCGGCTCGCCTAG                                                |
| <b>AD12</b>           | GTCCAGACCATCGGGCTCTA                                               |
| <b>AD13</b>           | GGAAAGCCTGGTCTGAAAT                                                |
| <b>AD14</b>           | TTTGTCTCCTTGAAGGGATAGTT                                            |
| <b>AD15</b>           | CGGATCATCGATCGCATTCTG                                              |
| <b>AD24</b>           | ACCATCAAGAACTGCCCGTT                                               |
| <b>AD25</b>           | GTGACGGAATGACGCCGTAA                                               |
| <b>AD26</b>           | ATCTCCATTACACCGCTGCTT                                              |
| <b>AD27</b>           | TTTGTCCGCGAGGTCTTCGTT                                              |
| <b>AD28</b>           | GTGCTTCGTATGGCTCCAT                                                |
| <b>AD29</b>           | AATGACCTCTGACCGGCGTTA                                              |
| <b>MW125</b>          | GCGGTGACGTTATGGAGCAGCAACGATGTT                                     |
| <b>MW126</b>          | GCGCTGCAGAGTACTTTAGGTGGCGGTACTTGGGTCG                              |
| <b>MW1028</b>         | GCGCATATGTCCAATTTACTGACCGTACACCAAAT                                |
| <b>MW1029</b>         | GCTAGCGAATTCTAGTCGCCATC                                            |
| <b>MW1041</b>         | CGCCATATGTAATTTCTCCTCTTTAATTCTAGAGTC                               |
| <b>MW1042</b>         | TCGCGCTAACTTACATTAATTG                                             |
| <b>MW1043</b>         | CGTATCCCAGAGGCAGCAAATTGC                                           |
| <b>MW1044</b>         | GCGCATATGCCCGCTTGGCTCCCCTGGTG                                      |
| <b>MW1046</b>         | ATAACTTCGTATATGGTATTATATACGAACGGTAG                                |
| <b>MW1047</b>         | TCGACTACCGTTCGTATATAATACCATATACGAAGTTAT                            |
| <b>MW1048</b>         | GTACCGTTCGTATAGCATACATTATACGAAGTTAT                                |
| <b>MW1049</b>         | ATAACTTCGTATAATGTATGCTATACGAACGGTACTGCA                            |
| <b>JD253</b>          | CTCGCAGAGCAGGATTTCCCGTT                                            |
| <b>JD254</b>          | GGCAGGATAGGTGAAGTAGGCCCA                                           |
| <b>AR_for</b>         | GACCTTTTCTCCGACGAATAGA                                             |
| <b>AR_rev</b>         | GTCTTATCTGAAAGTTGTGCCTG                                            |
| <b>oriVSm_for</b>     | GAAACTGTCCTGGTCCGT                                                 |
| <b>oriVSm_rev</b>     | TTCAGTTACGATAGAGTTCCACG                                            |
| <b>synTer-MCS_for</b> | CTATTGAAGGAACACTGTATCTCG                                           |
| <b>synTer-MCS_rev</b> | GTCAACCCGCTTACACTC                                                 |
| <b>pMB1_for</b>       | TACTACTGTTTCAGACTGGCGTAATCACTCAGTAGATCAAAGGATCTTCTTGAGATCCTTTTTTTC |
| <b>pMB1_rev</b>       | TGGACAGAATAGTCTTACTCAGTGATTGCCAGTCGCGTTGCTGGCGTTTTTC               |
| <b>p15A_for</b>       | TACTACTGTTTCAGACTGGCGTAATCACTCAGTCTACATTTGAAGAGATAAATTGCACTG       |
| <b>p15A_rev</b>       | TGGACAGAATAGTCTTACTCAGTGATTGCCAGTTAGCGGAGTGATACTGCG                |
| <b>pSC101*_for</b>    | TACTACTGTTTCAGACTGGCGTAATCACTCAGTCTAGGGTACGGGTTTTGTC               |
| <b>pSC101*_rev</b>    | TGGACAGAATAGTCTTACTCAGTGATTGCCAGTGACAGTAAGACGGGTAAGCCT             |
| <b>mob_for</b>        | TGTGACGATAAGTTCCTACTG                                              |
| <b>mob_rev</b>        | CCTCTATTGATAACGGGTGACA                                             |
| <b>BO1</b>            | AACTTCTCGTGGAACTCTATCGTAACTGAAGTCTATTGAAGGAACACTGTATCTCGGTCA       |
| <b>BO2</b>            | GTTATCAGAAGAGTGAAGCGGGTACTATACTACTGTTTCAGACTGGCGTAATCACTC          |
| <b>BO3</b>            | GGCAATCACTGAGTAAGACTATTCTGTCCAGACCTTTTCTCCGACGAATAGAGTAACAGA       |
| <b>BO3a</b>           | GGCAATCACTGAGTAAGACTATTCTGTCCATGTGACGATAAGTTCCTACTGACAGAATC        |
| <b>BO3b</b>           | GGTTACAGTGTACCCGTTATCAATAGAGGGACCTTTTCTCCGACGAATAGAGTAACAGA        |
| <b>BO4</b>            | GATTGGTCAGGCACAACCTTTAGATAAGACGAACTGTCCTGGTCCGTTGATACAATCC         |

---

**Table S4** Fold induction of IPTG-inducible promoters in *M. extorquens* AM1. Mean  $\pm$  SD.

| Promoter                 | Fluorescence/OD <sub>600</sub> |                | Fold induction | Maximum strength relative to the P <sub>mxαF</sub> promoter (%)* |
|--------------------------|--------------------------------|----------------|----------------|------------------------------------------------------------------|
|                          | 0 mM IPTG                      | 1 mM IPTG      |                |                                                                  |
| background               | 339 $\pm$ 14                   | 355 $\pm$ 13   | n. a.          | n. a.                                                            |
| P <sub>mxαF</sub>        | 2152 $\pm$ 16                  | n. a.          | n. a.          | 100                                                              |
| P <sub>A1/O4/O3</sub>    | 376 $\pm$ 18                   | 1355 $\pm$ 11  | 27             | 55.6                                                             |
| P <sub>L/O4</sub>        | 526 $\pm$ 8                    | 3172 $\pm$ 147 | 15             | 156.8                                                            |
| P <sub>L/O4/O3</sub>     | 361 $\pm$ 4                    | 1132 $\pm$ 66  | 36             | 43.2                                                             |
| P <sub>L/O4/A1</sub>     | 471 $\pm$ 1                    | 3332 $\pm$ 43  | 23             | 165.7                                                            |
| P <sub>A1/O5/O4</sub>    | 416 $\pm$ 8                    | 1297 $\pm$ 14  | 12             | 52.4                                                             |
| P <sub>A1con/O5/O4</sub> | 384 $\pm$ 6                    | 1286 $\pm$ 91  | 21             | 51.8                                                             |
| P <sub>A1/O4</sub>       | 441 $\pm$ 4                    | 2531 $\pm$ 131 | 21             | 121.1                                                            |
| P <sub>A1/O4s</sub>      | 420 $\pm$ 14                   | 855 $\pm$ 17   | 6              | 27.8                                                             |
| P <sub>A1/O4s_GA</sub>   | 678 $\pm$ 5                    | 2235 $\pm$ 224 | 6              | 104.6                                                            |
| P <sub>T5s/A1</sub>      | 353 $\pm$ 6                    | 510 $\pm$ 4    | 11             | 8.6                                                              |

n. a. – not applicable. \*Values after induction with 1 mM IPTG.

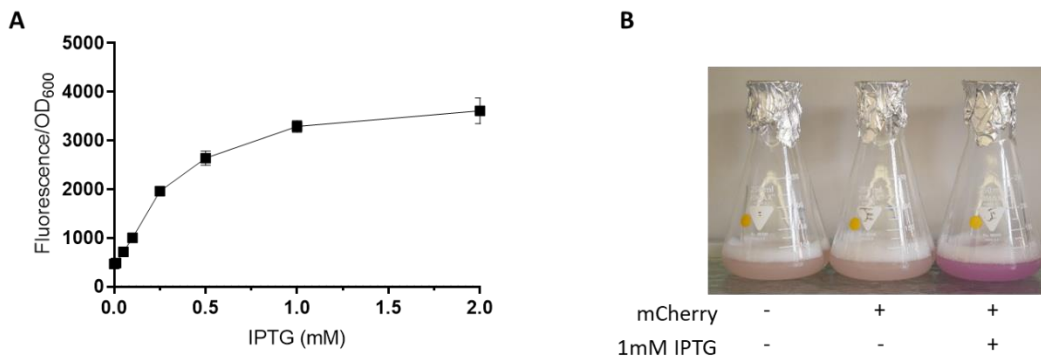

**Fig. S1** P<sub>L/O4/A1</sub> promoter in *M. extorquens* AM1. Dynamic range of expression with 0-2 mM IPTG (A). Cultures expressing  $\pm$  mCherry before and after induction with 1 mM IPTG; culture of an empty vector is shown as a reference (B).

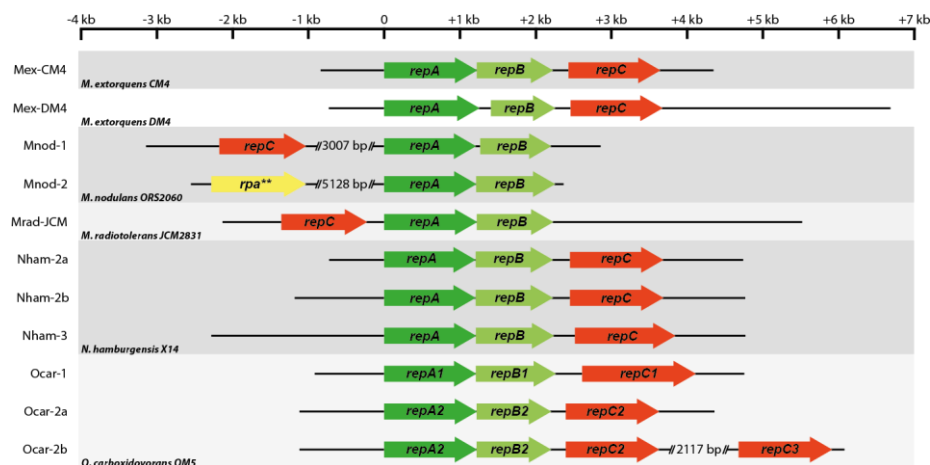

**Fig. S2** Overview of the individual *repABC* regions tested in this study. All *repABC* regions are shown with the start codon of *repA* aligned at the zero mark. The black lines depict the regions amplified outside of the *repABC* coding sequences to include necessary *parS* sites. A scale bar is given as a reference.

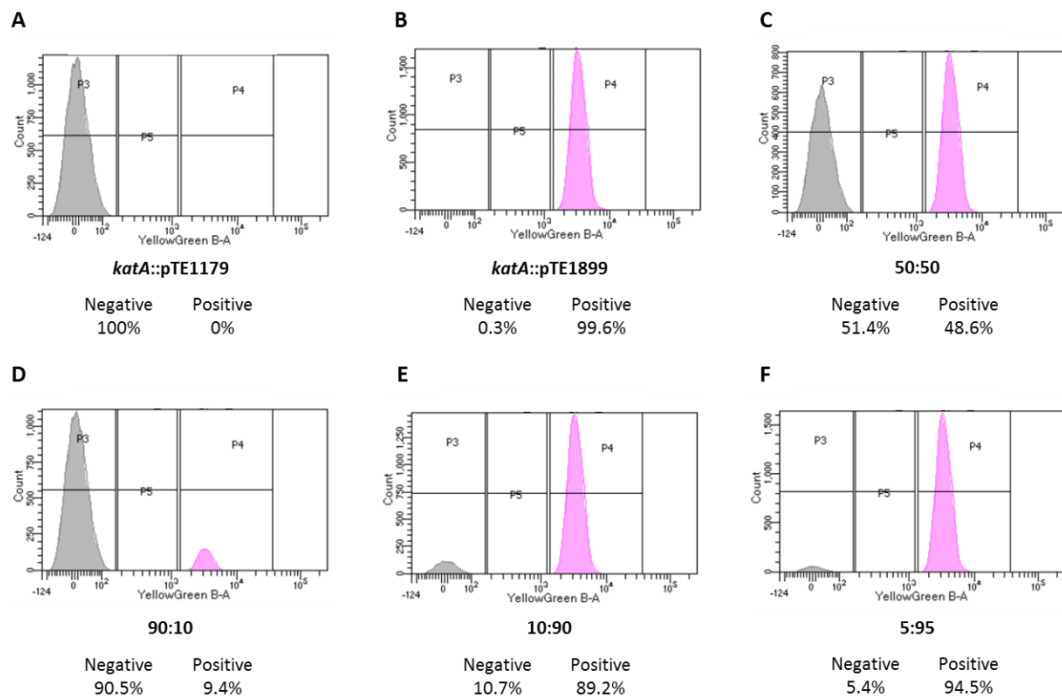

**Fig. S3** Verification of flow cytometry sensitivity. Control strains were created by integrating the suicide vector pK18mob2 with (*katA*::pTE1899) and without (*katA*::pTE1179) a mCherry expression cassette into the chromosome of *M. extorquens*. Gates for were adjusted to distinguish between fluorescent (shown in pink) and non-fluorescent (shown in grey) cells using *katA*::pTE1179 (A), *katA*::pTE1899 (B), and mixtures thereof (C-F). 30,000 events were recorded per sample.

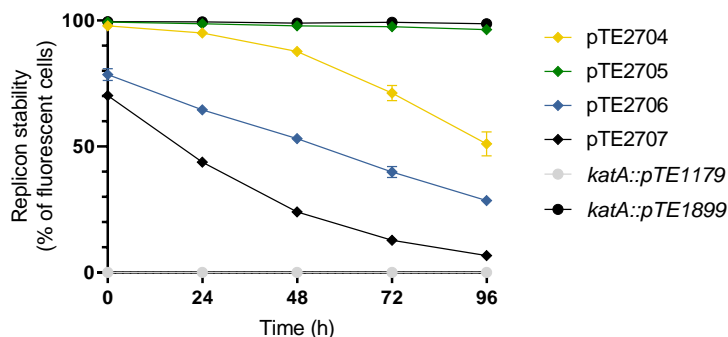

**Fig. S4** Replicon stability measured by flow cytometry of mini-chromosomes with Mex-DM4, Mrad-JCM, Nham-3, and Mex-CM4 *repABC* regions (pTE2704-7, respectively) and an mCherry expression cassette. Control strains were created by integrating the suicide vector pK18mob2 with (*katA*::pTE1899) and without (*katA*::pTE1179) an mCherry expression cassette into the chromosome of *M. extorquens* AM1. 30,000 events were recorded per sample.

**Table S5** DNA sequences of inducible promoters characterized in this study<sup>a</sup>.

| Promoter                 | Sequence                                                                                                                                                                                                        |
|--------------------------|-----------------------------------------------------------------------------------------------------------------------------------------------------------------------------------------------------------------|
| P <sub>A1/04/03</sub>    | <u>GACGTCTAAGAAACCATTATTATCATGACATTAACCTATAAAAAATAGGCGTATCACGAGGCCCTTTCGTCTTC</u><br>ACCTCGAGAAAA <b>TTTATCAAAAAGAGTGTGGACTTGTGAGCGGATAACAATGATACTTAGATTCAATTGTG</b><br><b>AGCGGATAACAATTTACACACTCTAGA</b>      |
| P <sub>L/04</sub>        | <u>GACGTCTAAGAAACCATTATTATCATGACATTAACCTATAAAAAATAGGCGTATCACGAGGCCCTTTCGTCTTC</u><br>ACCTCGAGAAAA <b>GATAAATTATCTCTGGCGGTGTGGACTTGTGAGCGGATAACAATGATACTGAGCACATC</b><br><b>AGCAGGACGCACTGACTCTAGA</b>           |
| P <sub>L/04/03</sub>     | <u>GACGTCTAAGAAACCATTATTATCATGACATTAACCTATAAAAAATAGGCGTATCACGAGGCCCTTTCGTCTTC</u><br>ACCTCGAGAAAA <b>GATAAATTATCTCTGGCGGTGTGGACTTGTGAGCGGATAACAATGATACTTAGATTCAA</b><br><b>TTGTGAGCGGATAACAATTTACACAGTCTAGA</b> |
| P <sub>L/04/A1</sub>     | <u>GACGTCTAAGAAACCATTATTATCATGACATTAACCTATAAAAAATAGGCGTATCACGAGGCCCTTTCGTCTTC</u><br>ACCTCGAGAAAA <b>GATAAATTATCTCTGGCGGTGTGGACTTGTGAGCGGATAACAATGATACTGAGCACATC</b><br><b>GAGAGGGACACGGCGACTCTAGA</b>          |
| P <sub>A1/05/04</sub>    | <u>GACGTCTAAGAAACCATTATTATCATGACATTAACCTATAAAAAATAGGCGTATCACGAGGCCCTTTCGTCTTC</u><br>ACCTCGAGAAAA <b>ATTGTGAGCGGTAACAATTTAGTTGACTTGTGAGCGGATAACAATGATACTTAGATTCT</b><br><b>ATCGAGAGGGACACGGCGACTCTAGA</b>       |
| P <sub>A1con/05/04</sub> | <u>GACGTCTAAGAAACCATTATTATCATGACATTAACCTATAAAAAATAGGCGTATCACGAGGCCCTTTCGTCTTC</u><br>ACCTCGAGAAAA <b>ATTGTGAGCGGTAACAATTTAGTTGACTTGTGAGCGGATAACAATTATAATTAGATTCT</b><br><b>ATCGAGAGGGACACGGCGACTCTAGA</b>       |
| P <sub>A1/04</sub>       | <u>GACGTCTAAGAAACCATTATTATCATGACATTAACCTATAAAAAATAGGCGTATCACGAGGCCCTTTCGTCTTC</u><br>ACCTCGAGAAAA <b>TTTATCAAAAAGAGTGTGGACTTGTGAGCGGATAACAATGATACTTAGATTCTATCGAGA</b><br><b>GGGACACGGCGACTCTAGA</b>             |
| P <sub>A1/04s</sub>      | <u>GACGTCTAAGAAACCATTATTATCATGACATTAACCTATAAAAAATAGGCGTATCACGAGGCCCTTTCGTCTTC</u><br>ACCTCGAGAAAA <b>TTTATCAAAAAGAGTGTGGACTTGTGAGCGCTACAATTGATACTTAGATTCTATCGAGA</b><br><b>GGGACACGGCGACTCTAGA</b>              |
| P <sub>A1/04s_GA</sub>   | <u>GACGTCTAAGAAACCATTATTATCATGACATTAACCTATAAAAAATAGGCGTATCACGAGGCCCTTTCGTCTTC</u><br>ACCTCGAGAAAA <b>TTTATCAAAAAGAGTGTGGACTTGTGAGCACTACAATTGATACTTAGATTCTATCGAGA</b><br><b>GGGACACGGCGACTCTAGA</b>              |
| P <sub>T5s/A1</sub>      | <u>GACGTCTAAGAAACCATTATTATCATGACATTAACCTATAAAAAATAGGCGTATCACGAGGCCCTTTCGTCTTC</u><br>ACCTCGAGAAAA <b>TTTATCAAAAAGAGTGTGGCTTTGTGAGCGCTACAATTTATAATTAGATTCAATTGTGA</b><br><b>GCGGATAACAATTTACACAGTCTAGA</b>       |

<sup>a</sup>The promoter region is shown in **bold**, AatII and XbaI restriction sites are underlined. The surrounding sequences were included only to facilitate primer hybridization.

## REFERENCES FOR SUPPORTING INFORMATION

1. Delaney, N. F., Kaczmarek, M. E., Ward, L. M., Swanson, P. K., Lee, M. C., and Marx, C. J. (2013) Development of an optimized medium, strain and high-throughput culturing methods for *Methylobacterium extorquens*, *PLoS One* 8, e62957.
2. Dohlemann, J., Brennecke, M., and Becker, A. (2016) Cloning-free genome engineering in *Sinorhizobium meliloti* advances applications of Cre/loxP site-specific recombination, *J. Biotechnol.* 233, 160-170.
3. Figurski, D. H., and Helinski, D. R. (1979) Replication of an origin-containing derivative of plasmid RK2 dependent on a plasmid function provided in trans, *Proc. Natl. Acad. Sci. USA* 76, 1648-1652.
4. Tauch, A., Zheng, Z., Puhler, A., and Kalinowski, J. (1998) *Corynebacterium striatum* chloramphenicol resistance transposon Tn5564: genetic organization and transposition in *Corynebacterium glutamicum*, *Plasmid* 40, 126-139.
5. Datsenko, K. A., and Wanner, B. L. (2000) One-step inactivation of chromosomal genes in *Escherichia coli* K-12 using PCR products, *Proc. Natl. Acad. Sci. USA* 97, 6640-6645.
6. Chang, A. C., and Cohen, S. N. (1978) Construction and characterization of amplifiable multicopy DNA cloning vehicles derived from the P15A cryptic miniplasmid, *J. Bacteriol.* 134, 1141-1156.
7. Urban, J. H., and Vogel, J. (2007) Translational control and target recognition by *Escherichia coli* small RNAs in vivo, *Nucleic Acids Res.* 35, 1018-1037.

8. Ind, A. C., Porter, S. L., Brown, M. T., Byles, E. D., de Beyer, J. A., Godfrey, S. A., and Armitage, J. P. (2009) Inducible-expression plasmid for *Rhodobacter sphaeroides* and *Paracoccus denitrificans*, *Appl. Environ. Microbiol.* *75*, 6613-6615.
9. Schada von Borzyskowski, L., Remus-Emsermann, M., Weishaupt, R., Vorholt, J. A., and Erb, T. J. (2015) A set of versatile brick vectors and promoters for the assembly, expression, and integration of synthetic operons in *Methylobacterium extorquens* AM1 and other alphaproteobacteria, *ACS Synth. Biol.* *4*, 430-443.
10. Döhlemann, J., Wagner, M., Happel, C., Carrillo, M., Sobetzko, P., Erb, T. J., Thanbichler, M., and Becker, A. (2017) A Family of Single Copy repABC-Type Shuttle Vectors Stably Maintained in the Alpha-Proteobacterium *Sinorhizobium meliloti*, *ACS Synth. Biol.* *6*, 968-984.
